# Supplementary material
Source: PubMed Central journal article supplement (PMC3804139)
Supplement: NIHMS513826-supplement-supp_info.pdf [file NIHMS513826-supplement-supp_info.pdf]

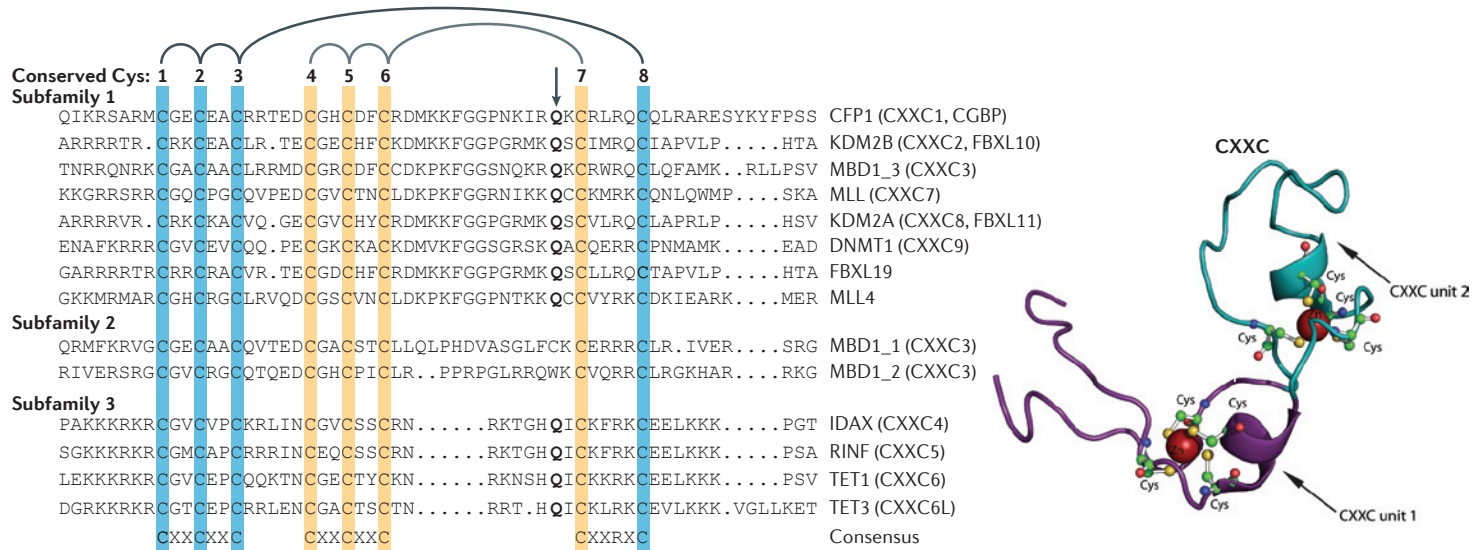

Supplementary information S1 (figure) | **The CXXC domain of TET family members.**

TET proteins contain a DNA-binding CXXC domain near the N-terminus. Sequence alignment of CXXC domains (left). The conserved Cys residues contained within each Zn<sup>2+</sup>-chelating module are coloured separately (module 1 blue, module 2 yellow), and the Cys residues are connected with curved lines. A key Gln conserved in all DNA-binding members of the CXXC domain family is indicated with an arrow. The structure of the CXXC domain of MLL1 (also known as CXXC7) (PDB: 2KKF) (right). Note that the second CXXC unit is inserted within the first.
